# Supplementary material for: Visualization of ligand-induced dopamine D2S and D2L receptor internalization by TIRF microscopy
Source: PubMed Central journal article supplement (PMC5589927; doi:10.1038/s41598-017-11436-1), 2017-09-07
Supplement: 41598_2017_11436_MOESM1_ESM.pdf [file 41598_2017_11436_MOESM1_ESM.pdf]

## Supplementary Information (SI)

### Visualization of ligand-induced dopamine D<sub>2S</sub> and D<sub>2L</sub> receptor internalization by TIRF microscopy

*Alina Tabor<sup>1</sup>, Dorothee Möller<sup>1</sup>, Harald Hübner<sup>1</sup>, Johannes Kornhuber<sup>2</sup> and Peter Gmeiner<sup>1,\*</sup>*

<sup>1</sup> Department of Chemistry and Pharmacy, Emil Fischer Center, Friedrich-Alexander University Erlangen-Nürnberg, Schuhstraße 19, 91052 Erlangen, Germany

<sup>2</sup> Department of Psychiatry and Psychotherapy, Friedrich-Alexander University Erlangen-Nürnberg, Schwabachanlage 6, 91054 Erlangen, Germany

\* Correspondence to: [peter.gmeiner@fau.de](mailto:peter.gmeiner@fau.de)

## Supplementary Table

**Supplementary Table S1.** Receptor binding data and functional properties for quinpirole and the fluorescent ligands **1a,b** and **2a,b** at human D<sub>2L</sub>, D<sub>2S</sub> and D<sub>3</sub> receptors.

| compound   | binding affinity <sup>a</sup>           |                     |                     | β-arrestin-2 recruitment <sup>b</sup> |                      |                       |                      |
|------------|-----------------------------------------|---------------------|---------------------|---------------------------------------|----------------------|-----------------------|----------------------|
|            | [ <sup>3</sup> H]spiperone displacement |                     |                     | PathHunter Assay                      |                      |                       |                      |
|            | hD <sub>2L</sub>                        | hD <sub>2S</sub>    | hD <sub>3</sub>     | hD <sub>2L</sub>                      |                      | hD <sub>2S</sub>      |                      |
|            | K <sub>i</sub> [nM]                     | K <sub>i</sub> [nM] | K <sub>i</sub> [nM] | EC <sub>50</sub> [nM]                 | E <sub>max</sub> [%] | EC <sub>50</sub> [nM] | E <sub>max</sub> [%] |
| quinpirole | 260 ± 40                                | 70 ± 20             | 15 ± 4              | 110 ± 10                              | 100 ± 1              | 79 ± 9                | 100 ± 1              |
| <b>1a</b>  | 3.8 ± 2.8                               | 7.8 ± 3.7           | 5.3 ± 2.3           | n.d.                                  | < 5                  | n.d.                  | < 6                  |
| <b>1b</b>  | 29 ± 9.6                                | 42 ± 12             | 19 ± 4.3            | n.d.                                  | < 5                  | n.d.                  | < 6                  |
| <b>2a</b>  | 8.8 ± 6.1                               | 7.1 ± 2.1           | 0.44 ± 0.20         | 400 ± 60                              | 83 ± 7               | 240 ± 70              | 87 ± 4               |
| <b>2b</b>  | 6.0 ± 2.7                               | 7.7 ± 5.0           | 2.8 ± 0.5           | 230 ± 30                              | 96 ± 4               | 230 ± 60              | 75 ± 7               |

<sup>a</sup>K<sub>i</sub> values were taken from the authors' publications: Tabor et al. (2016, ref. 33) and Möller et al. (2014, ref. 60) and are given in nM ± standard deviation (s.d.) derived from n ≥ 2 individual experiments, each performed in triplicates. <sup>b</sup>β-arrestin-2 recruitment at D<sub>2L</sub> and D<sub>2S</sub> was normalized to the maximum response of the reference agonist quinpirole (100%) and vehicle (0%). Results are indicated as mean ± standard error (s.e.m.) of n ≥ 3 individual experiments, each performed in duplicates.

## Supplementary Figures

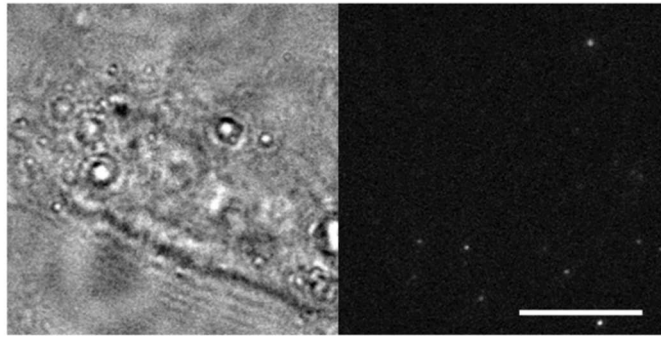

**Supplementary Figure S1. Fluorescent ligand-induced  $D_{2S}$  receptor cluster formation is blocked by the pretreatment with the unlabeled antagonist spiperone.** Representative brightfield (left) and TIRF microscopy image (right) of a CHO cell stably expressing  $D_{2S}$  receptors, pretreated with 10  $\mu$ M spiperone for 2 h and subsequently incubated with the fluorescent agonist **2b** (10 nM) for 1 h. Neither cell-surface labeling nor fluorescent puncta were visible. Scale bar, 10  $\mu$ m.

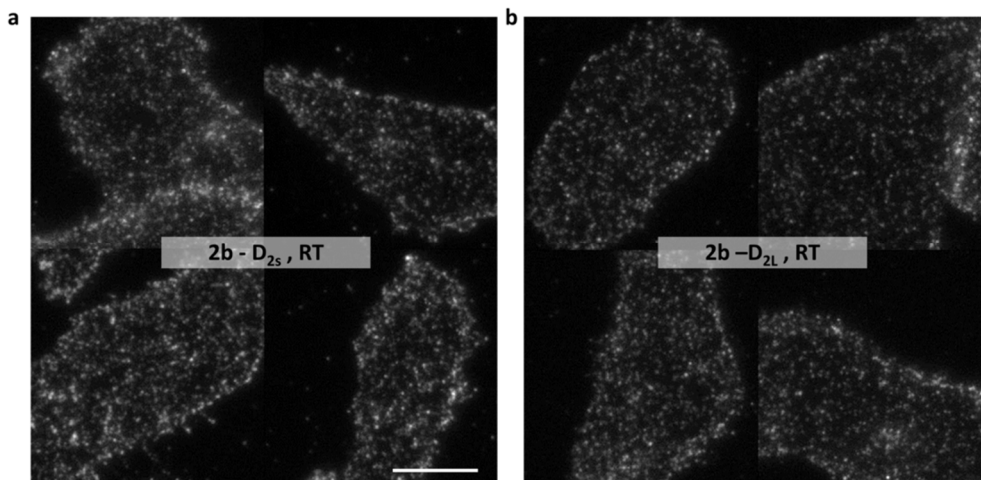

**Supplementary Figure S2. Reduced formation of clustered fluorescent puncta of  $D_{2S}$  and  $D_{2L}$  receptors at ambient temperature.** Representative TIRF microscopy images of CHO-cells stably expressing  $D_{2S}$  (a) or  $D_{2L}$  (b) receptors exposed to the fluorescent agonist **2b** (10  $\mu$ M) for 1h at 22-24  $^{\circ}$ C. The number of intracellular fluorescent puncta is significantly reduced compared to the incubation temperature at 37 $^{\circ}$ C (see Fig. 1d,e). Scale bar, 10  $\mu$ m.

## Supplementary Movies

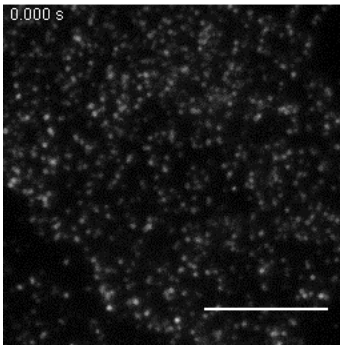

**Supplementary Movie S1.** First 100 frames of a TIRF microscopy recording of D<sub>25</sub> receptors labeled with the fluorescent antagonist **1b** in the plasma membrane of a single CHO cell (50 ms exposure time, frame rate of 19.32 fps). An image of this cell is shown in Figure 1b (main text).

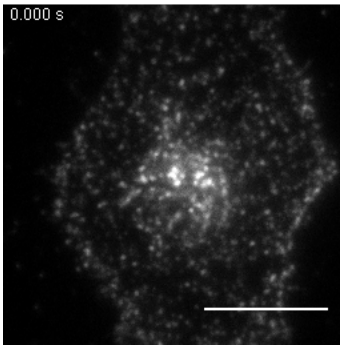

**Supplementary Movie S2.** First 100 frames of a TIRF microscopy recording of D<sub>25</sub> receptors labeled with the fluorescent agonist **2b** in the plasma membrane of a single CHO cell (50 ms exposure time, frame rate of 19.32 fps). An image of this cell is shown in Figure 1d (main text).

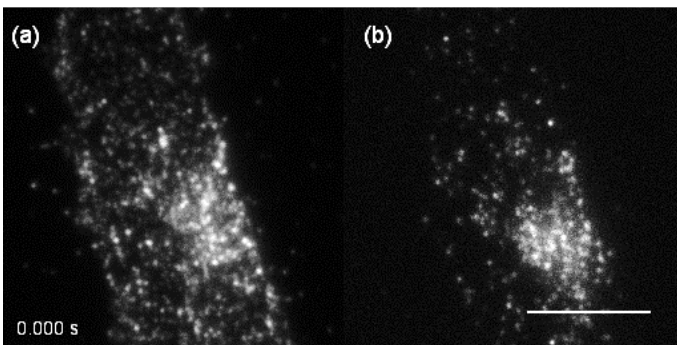

**Supplementary Movie S3.** First 30 frames of a TIRF microscopy recording of a single CHO cell stably expressing the D<sub>25</sub> receptor incubated with the fluorescent ligand **2b** for 1h before (a) and after treatment (b) with NaBH<sub>4</sub>. (30 mM, 5 min). Scale bar, 10  $\mu$ m. An image of this cell is shown in Figure 4a (main text).
